# Supplementary material
Source: PubMed Central journal article supplement (PMC5932213)
Supplement: NIHMS942939-supplement-7.pdf [file NIHMS942939-supplement-7.pdf]

**Table S1. List of tyrosine kinases in kinase antibody array and ORF library**

| Kinases     | Kinase antibody array | ORF library |
|-------------|-----------------------|-------------|
| Akt/PKB/Rac | +                     | +           |
| ALK         | +                     |             |
| Axl         | +                     | +           |
| BLK         |                       | +           |
| BMX         |                       | +           |
| BTK         |                       | +           |
| c-Abl       | +                     |             |
| c-Kit/SCFR  | +                     |             |
| CLK1        |                       | +           |
| DYRK1B      |                       | +           |
| DYRK2       |                       | +           |
| DYRK4       |                       | +           |
| EGFR/ErbB1  | +                     |             |
| EphA1       | +                     |             |
| EphA2       | +                     |             |
| EphA3       | +                     |             |
| EPHA4       |                       | +           |
| EphB1       | +                     |             |
| EphB3       | +                     |             |
| EphB4       | +                     |             |
| FGFR1       | +                     | +           |
| FGFR3       | +                     |             |
| FGFR4       | +                     |             |
| FGR         |                       | +           |
| FLT3/Flk2   | +                     |             |
| FRK         |                       | +           |
| HCK         |                       | +           |
| HER2/ErbB2  | +                     |             |
| HER3/ErbB3  | +                     |             |
| IGF-IR      | +                     |             |
| InsR        | +                     |             |
| IRS-1       | +                     |             |
| ITK         |                       | +           |
| JAK3        |                       | +           |
| Lck         | +                     | +           |
| MAP2K5      |                       | +           |

|                         |    |    |
|-------------------------|----|----|
| MAP2K6                  |    | +  |
| MAP2K7                  |    | +  |
| MATK                    |    | +  |
| M-CSFR/CSF-1R           | +  |    |
| Met/HGFR                | +  |    |
| p44/42 MAPK<br>(ERK1/2) | +  |    |
| PDGFR                   | +  |    |
| PTK2                    |    | +  |
| PTK9L                   |    | +  |
| Ret                     | +  | +  |
| Ron/MST1R               | +  |    |
| S6 Ribosomal Protein    | +  |    |
| Src                     | +  |    |
| Stat1                   | +  |    |
| Stat3                   | +  |    |
| SYK                     |    | +  |
| TEC                     |    | +  |
| TIE1                    |    | +  |
| Tie2/TEK                | +  |    |
| TNK2                    |    | +  |
| TrkA/NTRK1              | +  |    |
| TrkB/NTRK2              | +  |    |
| TrkC/NTRK3              |    | +  |
| TTK                     |    | +  |
| TYK2                    |    | +  |
| Tyro3/Dtk               | +  |    |
| VEGFR2/KDR              | +  |    |
| YES                     |    | +  |
| Zap-70                  | +  | +  |
| 65                      | 38 | 33 |

**Table S2. Percentage of cases with altered tyrosine kinases in various cancer types**

| Percent cases altered | Cancer datasets  |                 |                |                     |                        |                   |                |                 |
|-----------------------|------------------|-----------------|----------------|---------------------|------------------------|-------------------|----------------|-----------------|
|                       | Tyrosine kinases | Pancreas (UTSW) | Ovarian (TCGA) | Stomach/ Esophageal | Prostate (FHCRC, 2016) | Breast (METABRIC) | Bladder (TCGA) | Melanoma (TCGA) |
| ErbB2                 | 11.90%           | 3.90%           | 27.50%         | 1.50%               | 18.30%                 | 13.40%            | 3.10%          | 5.20%           |
| Tyro3                 | 1.80%            | 3.90%           | 4.50%          | 3.70%               | 0.50%                  | 1.60%             | 4.20%          | 3.50%           |
| AXL                   | 16.50%           | 5.50%           | 4.90%          | 4.40%               | 0.50%                  | 5.50%             | 4.90%          | 3%              |
| EphA2                 | 14.70%           | 4.20%           | 4.90%          | 2.90%               | 0.10%                  | 7.90%             | 8.40%          | 3%              |
| FAK                   | 15.60%           | 36.70%          | 12.10%         | 30.90%              | 21.70%                 | 7.90%             | 8%             | 7%              |
| Total                 | 60.50%           | 54.20%          | 53.90%         | 43.40%              | 41.10%                 | 36.30%            | 28.60%         | 21.70%          |

<http://www.cbioportal.org/index.do>

**Table S3. Cellular glycolytic index of MCF10A sublines (normalized to 10A.pLHCX)**

|                              | <b>10A.pLHCX</b> | <b>10A.PKM2</b> | <b>10A.Y105F</b> | <b>10A.Y105D</b> |
|------------------------------|------------------|-----------------|------------------|------------------|
| Glucose uptake (G)           | 2481.67          | 2308.00         | 2169.00          | 2369.00          |
| Lactate production (L)       | 1.71             | 1.66            | 1.69             | 1.11             |
| Oxygen consumption (O)       | 47.37            | 46.42           | 37.86            | 16.75            |
| Glycolytic index (G x L / O) | 89.61            | 82.77           | 96.84            | 157.39           |
| Fold change                  | 1.00             | 0.92            | 1.08             | 1.76             |
