# Supplementary material
Source: PubMed Central journal article supplement (PMC5932213)

**Figure S1.**

**A**

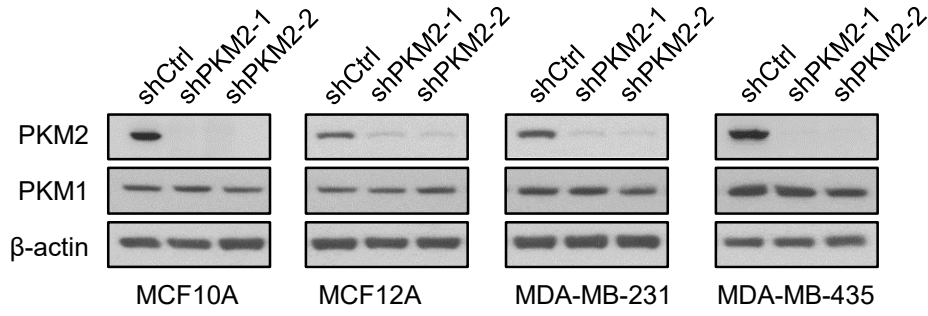

**B**

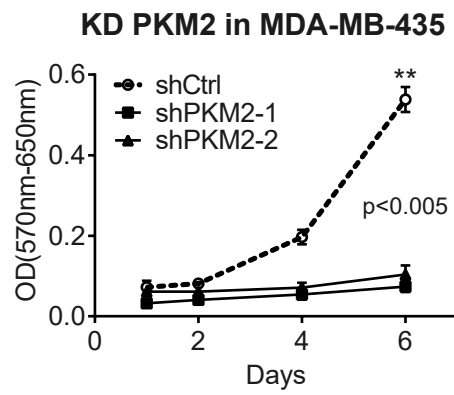

**C**

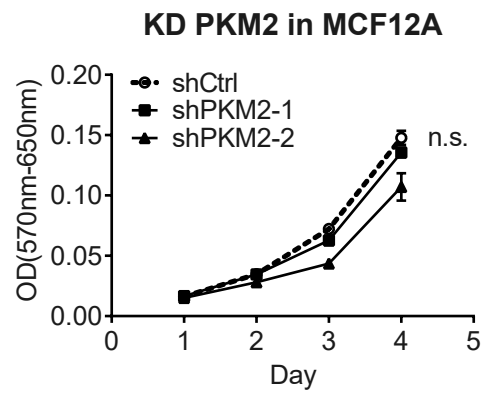

Supplement: NIHMS942939-supplement-2.pdf [file NIHMS942939-supplement-2.pdf]

**Figure S2.**

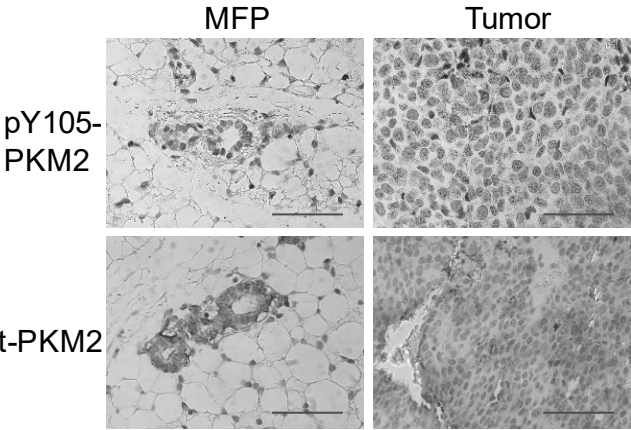

Supplement: NIHMS942939-supplement-3.pdf [file NIHMS942939-supplement-3.pdf]

**Figure S3.**

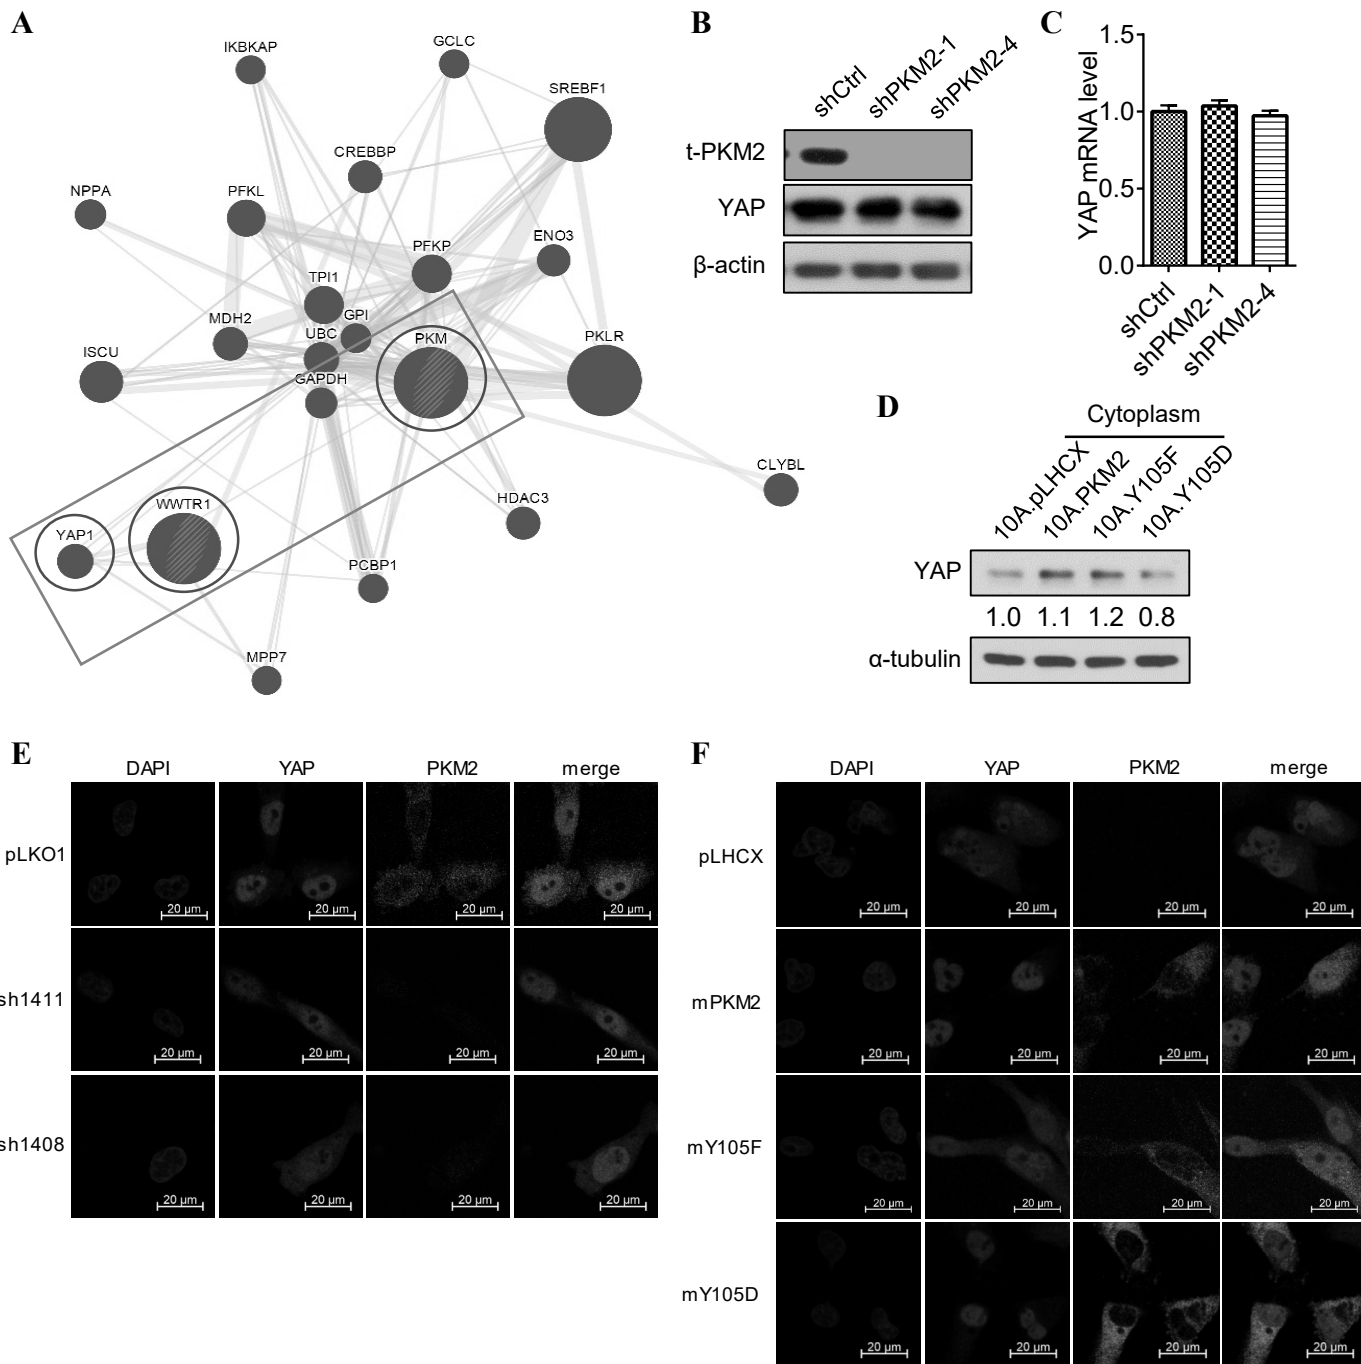

Supplement: NIHMS942939-supplement-4.pdf [file NIHMS942939-supplement-4.pdf]

**Figure S4.**

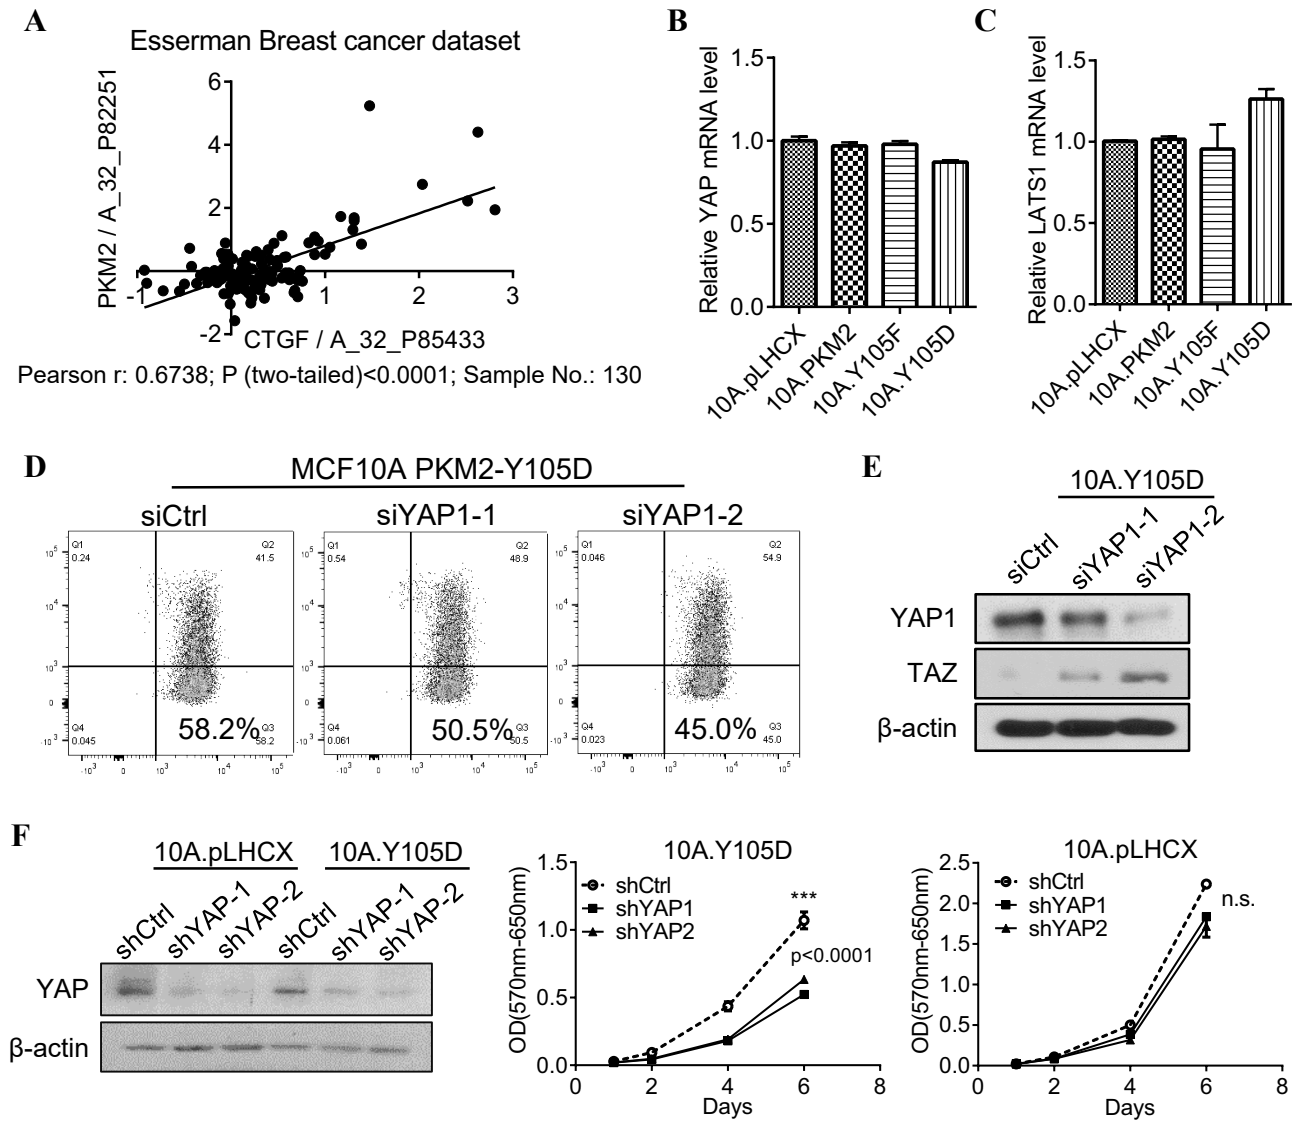

Supplement: NIHMS942939-supplement-5.pdf [file NIHMS942939-supplement-5.pdf]
